# Supplementary material for: Fluorescence properties of novel deep-red phosphor LiMg4SbO7:Mn4+ with excellent quantum efficiency and color purity for warm white LEDs
Source: Royal Society of Chemistry journal article supplement (doi:10.1039/d4dt00868e), 2024-01-01
Supplement: d4dt00868e1.pdf [file d4dt00868e1.pdf]

## Supporting information

### Fluorescence properties of novel deep-red phosphor $\text{LiMg}_4\text{SbO}_7:\text{Mn}^{4+}$ with excellent quantum efficiency and color purity for warm white LEDs

Fei Wang<sup>‡\*a,c,d</sup>, Huihui Chen<sup>‡b</sup>, Shiwei Zhang<sup>\*a,c</sup>, Huiqing Jin<sup>\*a,c</sup>

*<sup>a</sup>Key Laboratory of Traffic Information and Safety of Anhui Higher Education Institutes, Anhui Sanlian University, Hefei 230601, People's Republic of China*

*<sup>b</sup>Department of Pharmacy, the 901<sup>th</sup> Hospital of the Joint Logistics Support Force of People's Liberation Army, Hefei, 230031, People's Republic of China*

*<sup>c</sup>Anhui Sanlian Group, Hefei 230601, People's Republic of China*

*<sup>d</sup>Department of Chemistry, Anhui University, Hefei 230601, China*

*<sup>‡</sup>These authors contributed equally to this work and should be considered co-first authors.*

*\*Corresponding author: wangfchina@163.com; jinhuiqing@slu.edu.cn*

## Experiment

### Samples synthesis

The amount of each target samples  $\text{LiMg}_4\text{Sb}_{1-x}\text{O}_7:x\text{Mn}^{4+}$  ( $0.001 \leq x \leq 0.006$ ,  $\Delta x = 0.001$ ) synthesized is 0.0150 mol, and the exact mass of each synthetic raw material is weighed as follows, taking the sample of  $\text{LiMg}_4\text{SbO}_7:0.002\text{Mn}^{4+}$  ( $x=0.002$ ) as an example, 0.5542 g (0.0075 mol)  $\text{Li}_2\text{CO}_3$  (AR, Aladdin), 5.8296 g (0.0120 mol)  $(\text{MgCO}_3)_4 \cdot \text{Mg}(\text{OH})_2 \cdot 5\text{H}_2\text{O}$  (AR, Aladdin), 2.4215 g (0.0075 mol)  $\text{Sb}_2\text{O}_5$  (99%, Aladdin), 0.0035 g (0.00003 mol)  $\text{MnCO}_3$  (99.95%, Aladdin) and the mass of co-solvent  $\text{H}_3\text{BO}_3$ (GR) is 6% of the total mass of all raw materials, which is 0.5285 g.

Sample synthesis conditions: (1) Heating rate:  $15^\circ\text{C}/\text{min}$ , (2) Cooling method: natural cooling to room temperature with the furnace

### Instrument parameters

The diffraction data of each sample was collected by the D8 Advance X-ray powder diffractometer (Germany, Bruker). Instrument parameters: the radiation source was Cu target,  $\text{K}\alpha_1$  radiation  $\lambda = 0.15406$  nm, 40 mA, 40 kV, divergent slit 1 mm, receiving slit 0.1 mm, anti-scatter slit 1 mm. Step scanning, step speed:  $5 \text{ sec} \cdot \text{step}^{-1}$ , step size:  $0.01^\circ$ , scanning range  $10\text{-}60^\circ$ , using standard  $\alpha\text{-Al}_2\text{O}_3$  to correct the diffraction peak.

The sample morphology was examined by scanning electron microscopy (SEM, Germany, Zeiss Sigma 300) and the elemental composition was analyzed by energy dispersive X-ray spectrometry (EDX). Instrument parameters: Model of energy spectrometer: Smart EDX; Gold spraying target: pure gold; Electron Gun: Schottky Field Emission Electron Gun; Resolution:  $1.0\text{nm}@15\text{kV}$ ,  $1.6\text{nm}@1\text{kV}$ ; Electron light path: There is no cross light path for electron beams in the lens barrel; Accelerating voltage:  $0.02\text{-}30\text{kV}$ , continuously adjustable in 10V steps; Probe beam current:  $3\text{pA}\text{-}20\text{nA}$ , stability better than  $0.2\%/h$ ; Magnification:  $10\text{x}\text{-}1,000,000\text{x}$ ; Objective: Electromagnetic/Electrostatic Compound Lens; Detectors: Inlens and ET secondary electron detectors, and EDS spectrometers; Spectrum model: Smartedx; Energy

spectrum analysis working distance: 8.5 mm; Sample Chamber Dimensions: 365mm x 275mm; Stage travel: X = 125mm; Y = 125mm; Z = 50mm; T = -10° to 90°; R = 360° (continuously adjustable); Image capture: up to 32k x 24k.

X-ray photoelectron spectroscopy (XPS) of the samples obtained with Thermo Scientific K-Alpha (USA) (Excitation source: Al K $\alpha$  rays (h $\nu$ =1486.6eV); Beam spot: 400um; Analysis chamber vacuum better than 5.0E-7m Bar; Working voltage: 12kV; Filament current: 6 mA; Full spectrum scan: step size 1eV; Narrow spectrum scan: step size 0.05 eV).

Fluorescence spectrometer type: UK, Edinburgh FS5, Excitation light source: Xenon lamp, Scanning speed: 1 nm·s<sup>-1</sup>, Excitation slit width: 0.8, Emission slit width: 0.4.

Photoluminescence quantum efficiency is defined as the ratio of the emitted photons to the absorbed photons, and was measured by a spectrofluorometer (UK, Edinburgh, FLS1000). An integrating sphere was mounted on the spectrofluorometer with the entrance and exit ports located in 90° geometry. The PiG sample was located in the center of the integrating sphere. All the recorded spectroscopic data were corrected for the spectral responses of both the spectrofluorometer and the integrating sphere. The responses of the detecting systems (integrating sphere, monochromators and detectors) in photon flux were determined using a calibrated tungsten lamp. Based on this setup, The internal quantum efficiency (IQE) and external quantum efficiency (EQE) are calculated using the following formulas, respectively:

$$IQE = \frac{\text{Number of photons emitted}}{\text{Number of photons absorbed}} = \frac{L_{\text{sample}}}{E_{\text{reference}} - E_{\text{sample}}} \quad (1)$$

$$EQE = \frac{\text{Number of photons emitted}}{\text{Number of photons absorbed}} = \frac{L_{\text{sample}}}{E_{\text{reference}}} \quad (2)$$

$L_{\text{sample}}$  the emission intensity,  $E_{\text{reference}}$  and  $E_{\text{sample}}$  the intensities of the excitation light not absorbed by the reference and the sample respectively. The precursor glass was used as the standard reference. The difference in integrated areas between the sample and the reference represents the number of the absorbed photons. The photons emitted were determined by integrating the area of the emission band.

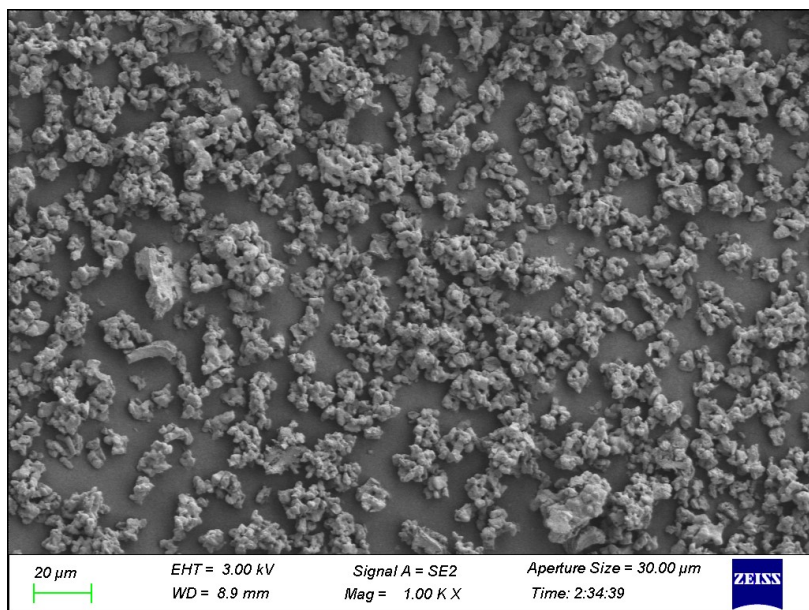

**Fig. S1.** The SEM image of  $\text{LiMg}_4\text{SbO}_7:0.002\text{Mn}^{4+}$  (20  $\mu\text{m}$ )

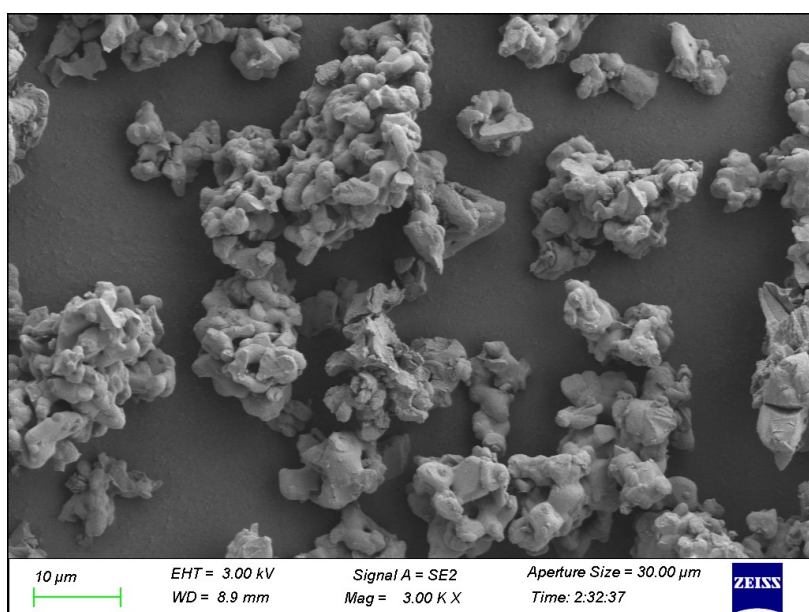

**Fig. S2.** The SEM image of  $\text{LiMg}_4\text{SbO}_7:0.002\text{Mn}^{4+}$  (10  $\mu\text{m}$ )

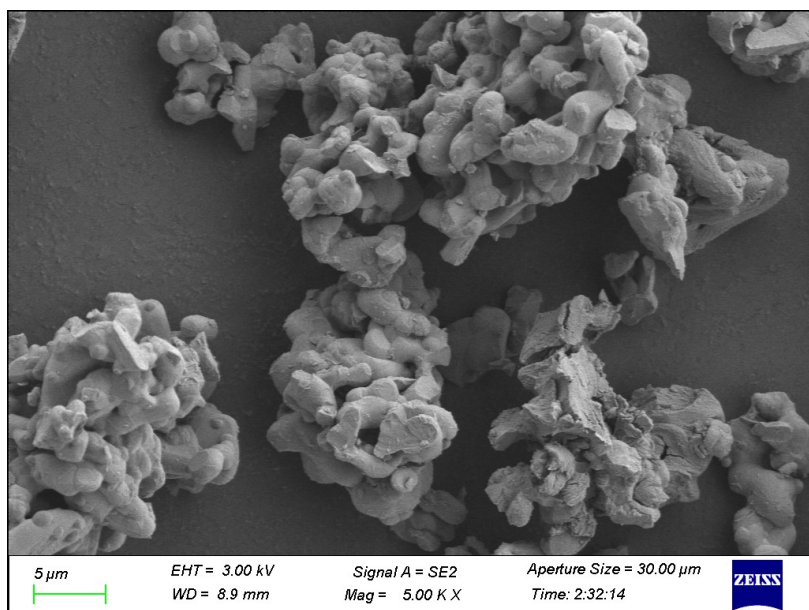

**Fig. S3.** The SEM image of  $\text{LiMg}_4\text{SbO}_7:0.002\text{Mn}^{4+}$  (5 μm)

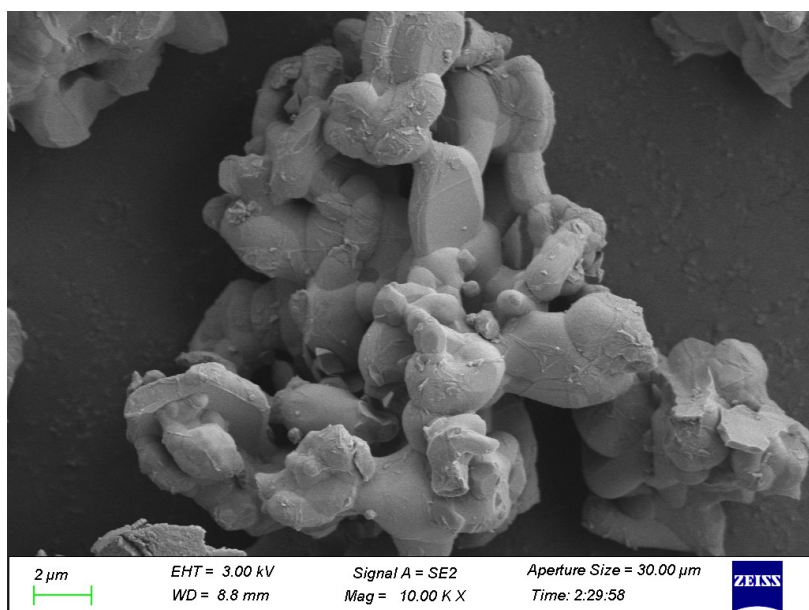

**Fig. S4.** The SEM image of  $\text{LiMg}_4\text{SbO}_7:0.002\text{Mn}^{4+}$  (2 μm)

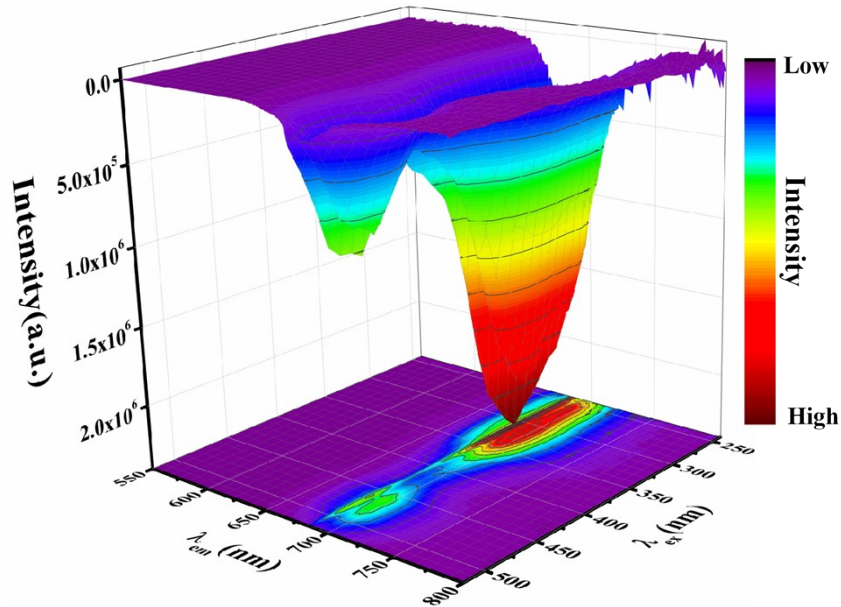

**Fig. S5.** Emission spectra and emission spectrum energy distribution of  $\text{LiMg}_4\text{SbO}_7:0.002\text{Mn}^{4+}$  under different excitation wavelengths ( $\lambda_{\text{ex}}=240\text{-}520$  nm, 10nm)

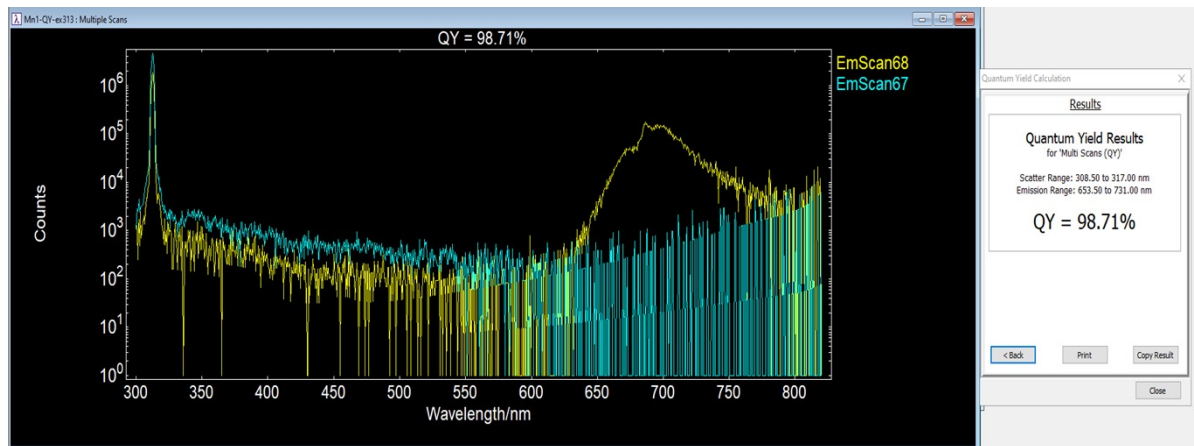

**Fig.S6** The IQE curve of  $\text{LiMg}_4\text{SbO}_7:0.002\text{Mn}^{4+}$  phosphor ( $\lambda_{\text{ex}} = 313$  nm)

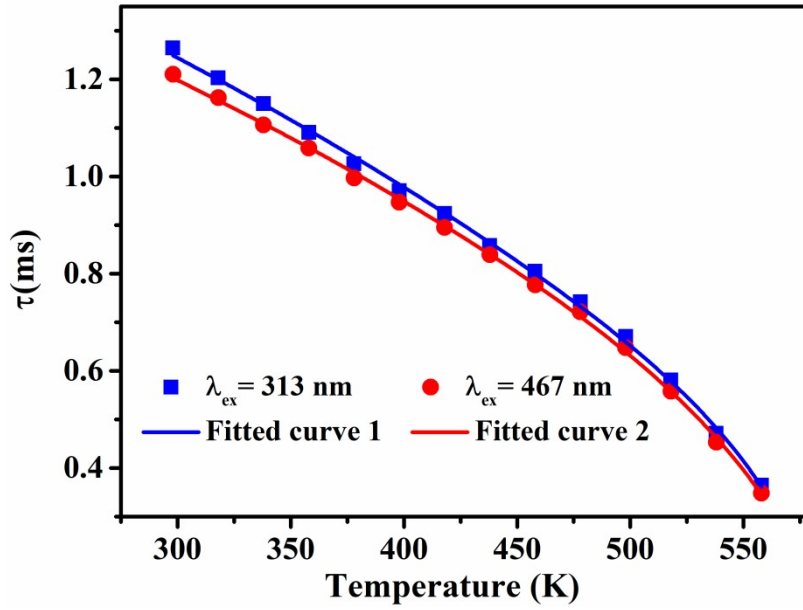

Fig.S7 Temperature-dependent average lifetime of  $\text{LiMg}_4\text{SbO}_7:0.002\text{Mn}^{4+}$

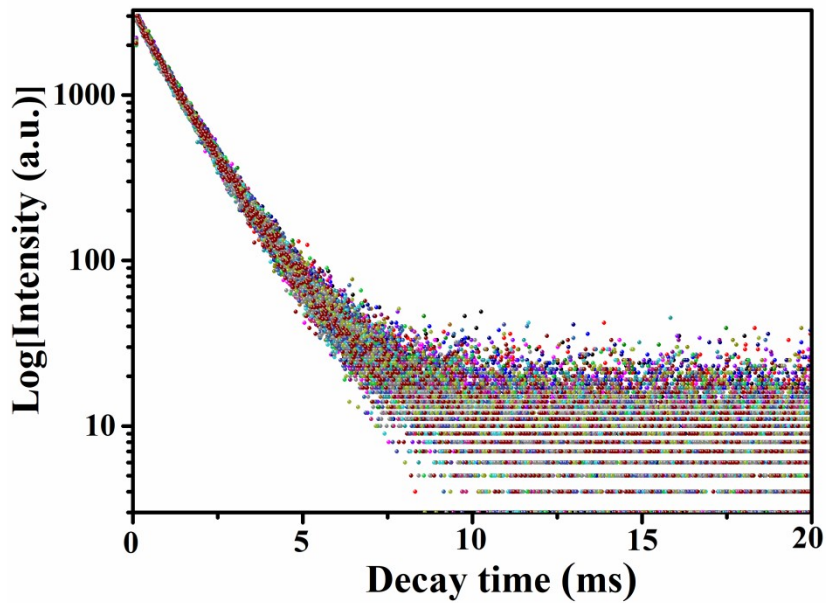

Fig. S8 The decay curves of  $\text{LiMg}_4\text{SbO}_7:0.002\text{Mn}^{4+}$  in 30 measurements ( $\lambda_{\text{ex}}=313$  nm,  $\lambda_{\text{em}}=686$  nm)

**Table S1.** Decay properties of  $\text{LiMg}_4\text{SbO}_7:x\text{Mn}^{4+}$  ( $0.001 \leq x \leq 0.006$ ) ( $\lambda_{\text{ex}}=313$  nm,  $\lambda_{\text{em}}=686$  nm).

| Eu content (x) | $A_1$   | $A_2$  | $\tau_1$ (ms) | $\tau_2$ (ms) | $\tau$ (ms) | $\chi^2$ | Fitted function    |
|----------------|---------|--------|---------------|---------------|-------------|----------|--------------------|
| x=0.001        | 2207.16 | 524.30 | 1.0928        | 2.0412        | 1.3838      | 1.4369   | Double exponential |



|           |         |         |        |        |        |        |                    |
|-----------|---------|---------|--------|--------|--------|--------|--------------------|
| $x=0.002$ | 2208.63 | 2583.34 | 0.9076 | 1.4547 | 1.2644 | 1.1439 | Double exponential |
| $x=0.003$ | 1190.44 | 1640.48 | 0.5986 | 1.3382 | 1.1570 | 1.0750 | Double exponential |
| $x=0.004$ | 957.88  | 1831.42 | 0.2606 | 1.1104 | 1.0175 | 1.3905 | Double exponential |
| $x=0.005$ | 1297.92 | 1185.31 | 0.4785 | 1.2313 | 1.0066 | 1.5561 | Double exponential |
| $x=0.006$ | 1252.89 | 1536.46 | 0.1855 | 0.9480 | 0.8431 | 1.5840 | Double exponential |

**Table S2.** Decay properties of  $\text{LiMg}_4\text{SbO}_7:0.002\text{Mn}^{4+}$  phosphor at different test temperatures ( $\lambda_{\text{ex}}=313$  nm,  $\lambda_{\text{em}}=686$  nm).

| Temperature | $A_1$   | $A_2$   | $\tau_1$ (ms) | $\tau_2$ (ms) | $\tau$ (ms) | $\chi^2$ | Fitted function    |
|-------------|---------|---------|---------------|---------------|-------------|----------|--------------------|
| 298 K       | 2208.63 | 2583.34 | 0.9076        | 1.4547        | 1.2644      | 1.1439   | Double exponential |
| 318 K       | 2946.73 | 1932.70 | 0.9346        | 1.4640        | 1.2029      | 1.2652   | Double exponential |
| 338 K       | 2235.81 | 2506.77 | 0.7977        | 1.3372        | 1.1499      | 1.3731   | Double exponential |
| 358 K       | 2445.72 | 2508.86 | 0.7616        | 1.2810        | 1.0905      | 1.3106   | Double exponential |
| 378 K       | 1643.43 | 3158.71 | 0.6118        | 1.1413        | 1.0258      | 1.2683   | Double exponential |
| 398 K       | 1742.01 | 2997.79 | 0.5848        | 1.0909        | 0.9707      | 1.3142   | Double exponential |
| 418 K       | 2017.75 | 2720.37 | 0.5812        | 1.0625        | 0.9236      | 1.3099   | Double exponential |
| 438 K       | 1880.58 | 3062.20 | 0.4743        | 0.9724        | 0.8576      | 1.2299   | Double exponential |
| 458 K       | 1981.36 | 2816.23 | 0.4376        | 0.9264        | 0.8045      | 1.4290   | Double exponential |
| 478 K       | 2506.62 | 2172.74 | 0.4394        | 0.9106        | 0.7421      | 1.4659   | Double exponential |
| 498 K       | 2219.55 | 2452.36 | 0.3578        | 0.7979        | 0.6708      | 1.5113   | Double exponential |
| 518 K       | 2291.03 | 2367.97 | 0.3020        | 0.6980        | 0.5811      | 1.6903   | Double exponential |
| 538 K       | 2672.36 | 1998.09 | 0.2774        | 0.5925        | 0.4712      | 1.7901   | Double exponential |
| 558 K       | 2933.08 | 1474.86 | 0.2247        | 0.4918        | 0.3647      | 1.8163   | Double exponential |

**Table S3.** Decay properties of  $\text{LiMg}_4\text{SbO}_7:0.002\text{Mn}^{4+}$  phosphor at different test temperatures ( $\lambda_{\text{ex}}=467$  nm,  $\lambda_{\text{em}}=686$  nm).



| Temperature | $A_1$   | $A_2$   | $\tau_1$ (ms) | $\tau_2$ (ms) | $\tau$ (ms) | $\chi^2$ | Fitted function    |
|-------------|---------|---------|---------------|---------------|-------------|----------|--------------------|
| 298 K       | 1917.18 | 2971.08 | 0.8041        | 1.3652        | 1.2107      | 1.3942   | Double exponential |
| 318 K       | 1252.96 | 3756.34 | 0.6174        | 1.2523        | 1.1626      | 1.3941   | Double exponential |
| 338 K       | 2911.77 | 1891.73 | 0.8417        | 1.3590        | 1.1065      | 1.4510   | Double exponential |
| 358 K       | 1911.07 | 2838.77 | 0.6673        | 1.2048        | 1.0588      | 1.7147   | Double exponential |
| 378 K       | 1885.72 | 2728.59 | 0.6322        | 1.1369        | 0.9968      | 1.5202   | Double exponential |
| 398 K       | 2524.69 | 2272.71 | 0.6538        | 1.1347        | 0.9470      | 1.7033   | Double exponential |
| 418 K       | 2639.38 | 2249.74 | 0.6205        | 1.0806        | 0.8954      | 1.7466   | Double exponential |
| 438 K       | 2495.53 | 2307.33 | 0.5547        | 1.0083        | 0.8391      | 1.7502   | Double exponential |
| 458 K       | 1881.44 | 2799.56 | 0.4004        | 0.8908        | 0.7771      | 1.8181   | Double exponential |
| 478 K       | 2219.76 | 2613.74 | 0.3853        | 0.8507        | 0.7214      | 1.8732   | Double exponential |
| 498 K       | 2363.05 | 2401.29 | 0.3409        | 0.7796        | 0.6476      | 1.8623   | Double exponential |
| 518 K       | 2407.20 | 2535.49 | 0.2759        | 0.6686        | 0.5581      | 1.8155   | Double exponential |
| 538 K       | 2227.00 | 2543.69 | 0.2135        | 0.5364        | 0.4530      | 1.8279   | Double exponential |
| 558 K       | 1781.76 | 1195.12 | 0.2048        | 0.4468        | 0.3486      | 1.8012   | Double exponential |

**Table S4** Optoelectronic parameters of LED-3 under different current drives.

| Current | CIE ( $x, y$ )   | CCT    | CRI  | LE (lm/W) |
|---------|------------------|--------|------|-----------|
| 10 mA   | (0.3575, 0.3809) | 4687 K | 83.6 | 118.78    |
| 30 mA   | (0.3560, 0.3762) | 4713 K | 83.8 | 118.00    |
| 50 mA   | (0.3548, 0.3729) | 4737 K | 83.9 | 114.38    |
| 70 mA   | (0.3537, 0.3701) | 4761 K | 84.0 | 110.73    |
| 90 mA   | (0.3528, 0.3676) | 4780 K | 84.1 | 107.19    |
| 110 mA  | (0.3518, 0.3652) | 4804 K | 84.2 | 103.86    |
| 130 mA  | (0.3510, 0.3632) | 4823 K | 84.5 | 100.43    |
| 150 mA  | (0.3502, 0.3614) | 4844 K | 84.5 | 96.80     |
| 170 mA  | (0.3496, 0.3596) | 4858 K | 84.7 | 94.71     |
| 190 mA  | (0.3488, 0.3577) | 4879 K | 84.8 | 92.23     |
| 210 mA  | (0.3481, 0.3562) | 4898 K | 84.9 | 89.49     |
| 230 mA  | (0.3474, 0.3545) | 4917 K | 85.1 | 87.01     |
| 250 mA  | (0.3466, 0.3529) | 4941 K | 85.1 | 84.73     |

---

|        |                  |        |      |       |
|--------|------------------|--------|------|-------|
| 270 mA | (0.3460, 0.3514) | 4958 K | 85.4 | 82.20 |
| 290 mA | (0.3453, 0.3499) | 4980 K | 85.5 | 79.91 |

---
